# Supplementary material
Source: Springer Nature journal article supplement (https://www.springermedizin.de/resource/supplementary/12936_2012_2586_MOESM2_ESM.pdf/9543330)

# PCR adjusted Kaplan-Meier survival curve - ITT analysis

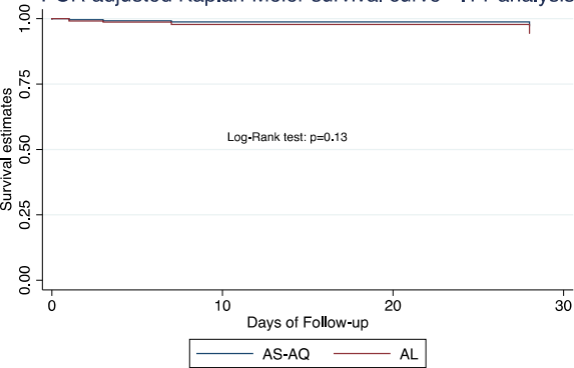

Supplement: MOESM2 [file 9543330]
